# Supplementary material for: Synthesis, spectroscopic characterization, pH dependent redox mechanism and DNA binding behavior of chlorohydroxyaniline derivatives
Source: Royal Society of Chemistry journal article supplement (doi:10.1039/c4ra03434a), 2014-01-01
Supplement: c4ra03434a2.pdf [file c4ra03434a2.pdf]

## Supporting information

### Supporting schemes

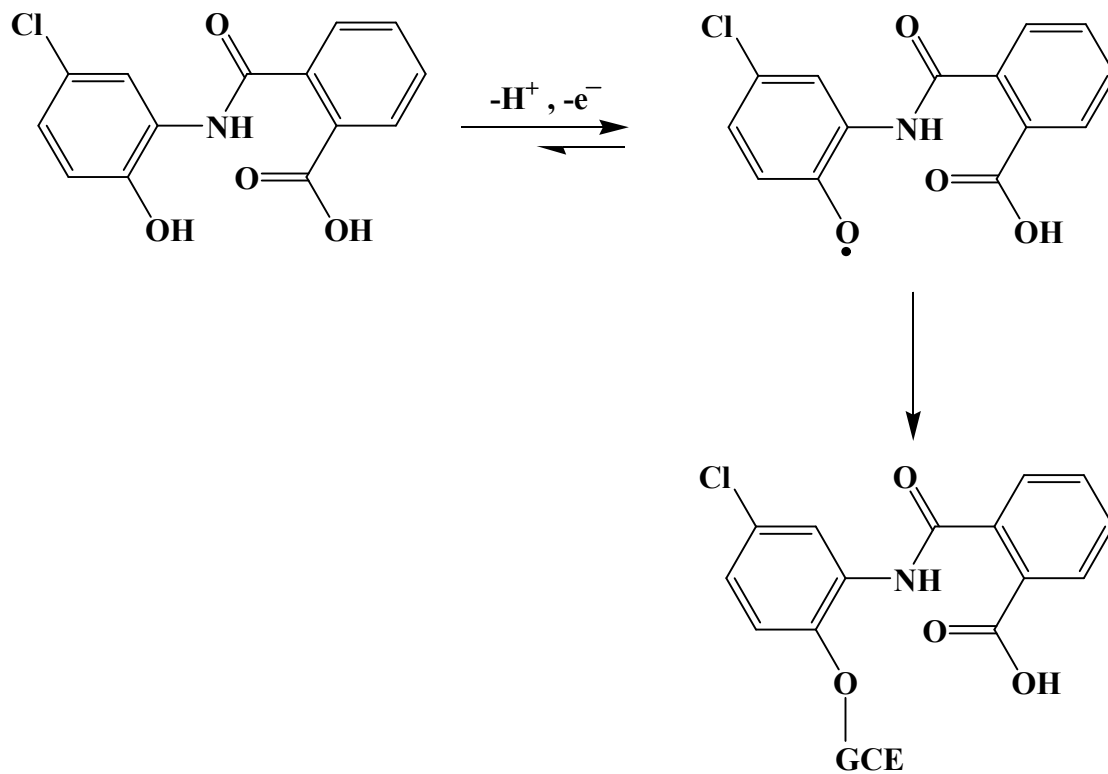

Scheme S1. Proposed oxidation mechanism of CBA.

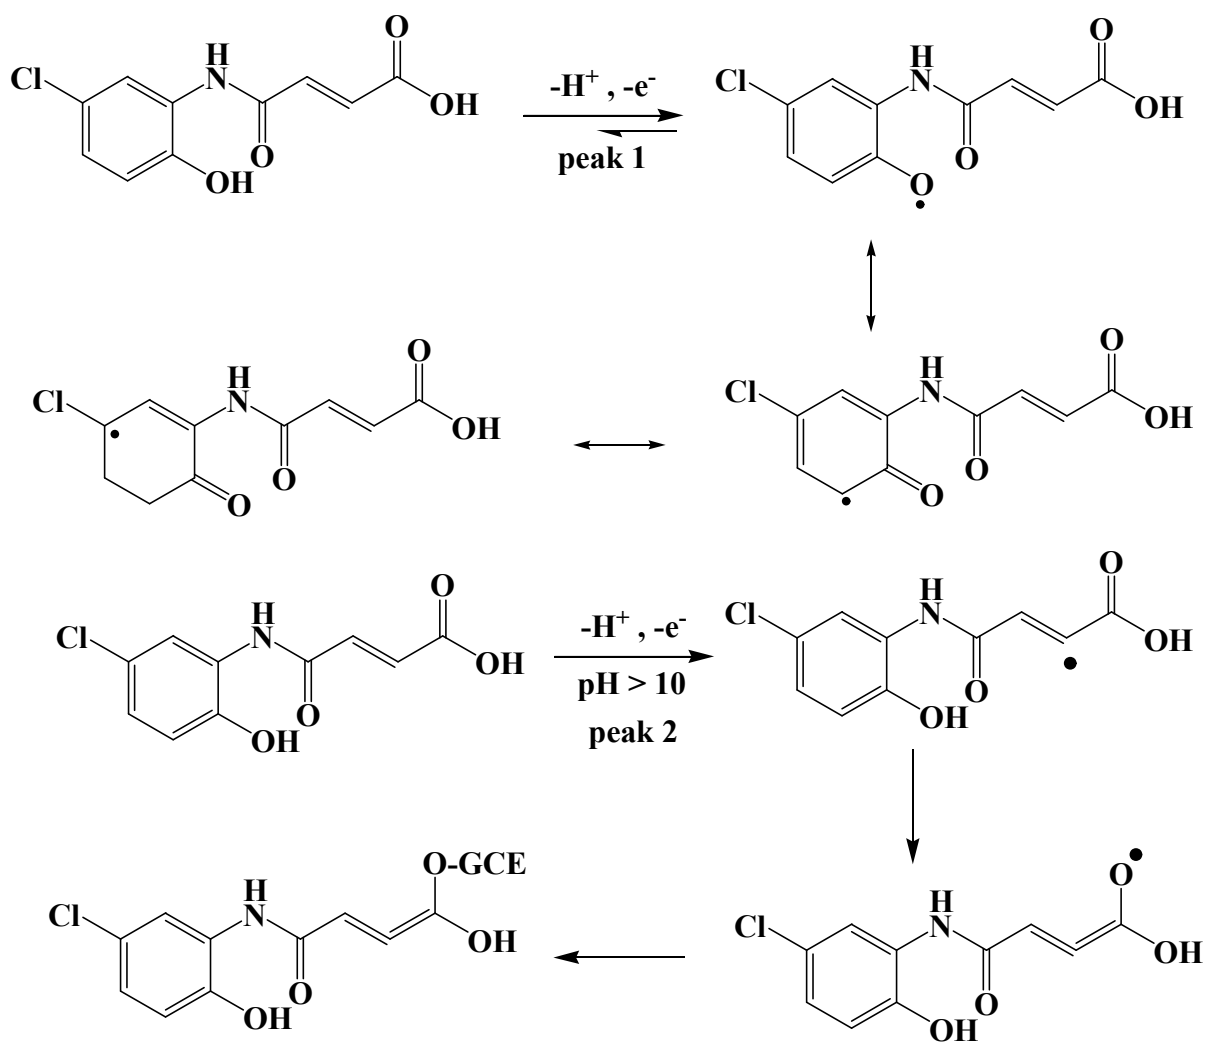

Scheme S2. Suggested oxidation mechanism of OBEA

## Supporting tables

Table S1: Characteristic IR frequencies ( $\text{cm}^{-1}$ ) of the compounds

| Comps.      | $\nu_{\text{OH}}$ | $\nu_{\text{NH}}$ | $\nu_{\text{C=O}}$ | $\nu_{(\text{COO})\text{asym}}$ | $\nu_{(\text{COO})\text{sym}}$ | $\Delta\nu$ |
|-------------|-------------------|-------------------|--------------------|---------------------------------|--------------------------------|-------------|
| <b>OBEA</b> | 3152              | 3395              | 1748               | 1691                            | 1358                           | 333         |
| <b>OBA</b>  | 3277              | 3376              | 1748               | 1699                            | 1352                           | 347         |
| <b>CBA</b>  | 3311              | 3379              | 1712               | 1699                            | 1384                           | 315         |

Table S2:  $^1\text{H}$  NMR data of the compounds

| Comps. | Proton No.     |                        |                        |                 |                       |                        |                       |         |
|--------|----------------|------------------------|------------------------|-----------------|-----------------------|------------------------|-----------------------|---------|
|        | H1             | H3                     | H4                     | NH              | H7                    | H9                     | H10                   | H12     |
| OBEA   | 13.12, s       | 6.37-6.33,<br>d [12]   | 6.65-6.61,<br>d [12.3] | 10.24, s        | 8.02-8.01,<br>d (2.4) | 7.03-6.99,<br>dd (2.4) | 6.90-6.87,<br>d [8.7] | 9.87, s |
| OBA    | 11.17,<br>s,bs | 2.53-2.48,<br>d [13.2] | 2.68-6.64,<br>d [13]   | 11.17, s,<br>bs | 7.98-7.97,<br>d (2.1) | 6.96-6.92,<br>dd (2.7) | 6.87-6.84,<br>d [8.4] | 9.27, s |
| CBA    | 10.22, s       | 6.37-6.33,<br>d [12]   | 6.65-6.61,<br>d [12.3] | 10.24, s        | 8.02-8.01,<br>d (2.4) | 7.03-6.99,<br>dd (2.4) | 6.90-6.87,<br>d [8.7] |         |

$^3\text{J}[\text{H}^1\text{H}]$  and  $^4\text{J}(\text{H}^1\text{H})$

Table S3:  $^{13}\text{C}$  NMR data of the compounds

| Comps. | Carbon No. |       |       |       |       |       |       |       |       |       |                               |
|--------|------------|-------|-------|-------|-------|-------|-------|-------|-------|-------|-------------------------------|
|        | 2          | 3     | 4     | 5     | 6     | 7     | 8     | 9     | 10    | 11    | a-d                           |
| OBEA   | 174.3      | 29.3  | 31.4  | 171.3 | 128.2 | 121.3 | 123.8 | 122.6 | 116.7 | 146.6 | -                             |
| OBA    | 167.8      | 130.9 | 132.0 | 163.8 | 127.4 | 121.9 | 124.8 | 122.6 | 116.2 | 147.2 | -                             |
| CBA    | 172.5      | 130.5 | 132.4 | 167.3 | 123.3 | 118.5 | 122.4 | 115.6 | 113.7 | 153.7 | 123.9, 143.3,<br>135.1, 130.7 |

Supporting figures

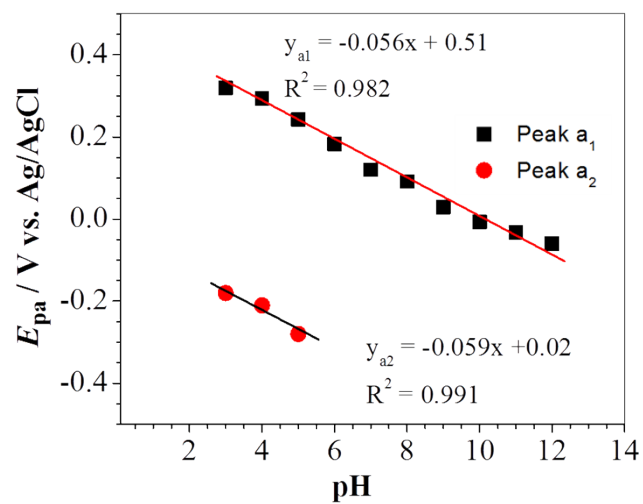

Fig. S1.  $E_p$  vs pH plots of CBA.

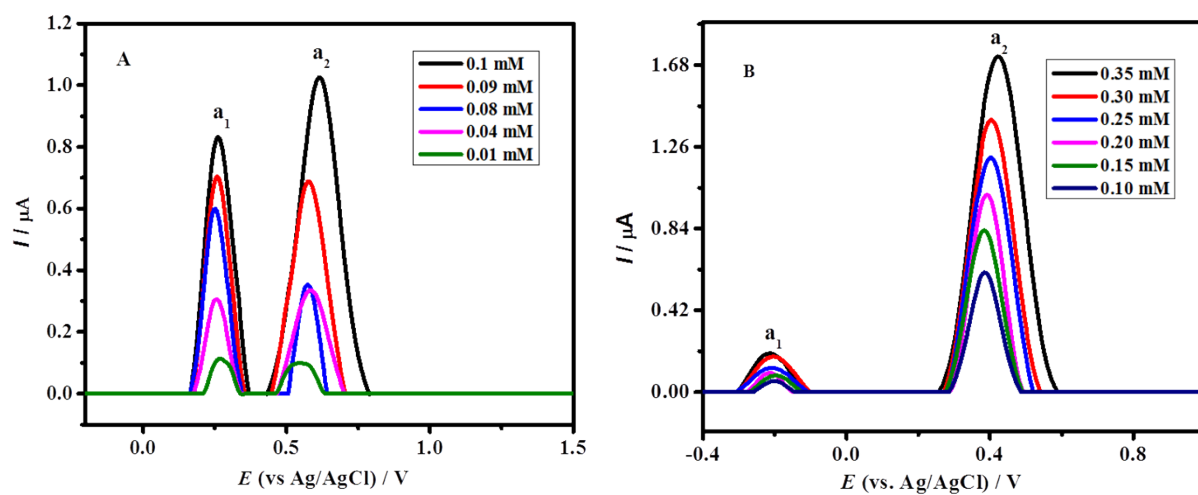

Fig. S2. Differential pulse voltammograms of different concentration of (A) OBEA and (B) CBA obtained at  $5 \text{ mVs}^{-1}$  in media of pH 3.0.

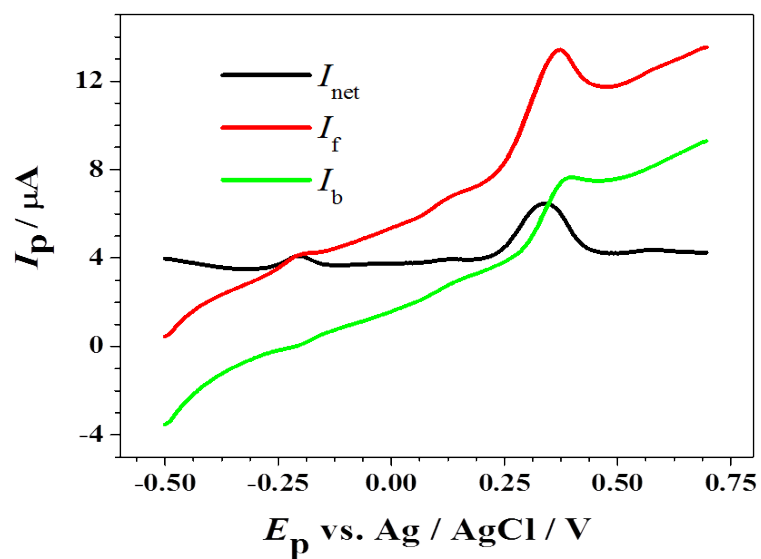

Fig. S3. SWV of 0.5 mM solution of CBA recorded in medium of pH 3.0, showing  $I_t$  – total current,  $I_f$  forward current,  $I_b$  – backward current;  $f = 20$  Hz,  $\Delta E_s = 5$  mV,  $v_{\text{eff}} = 100$  mV s<sup>-1</sup> and pulse amplitude = 50 mV.

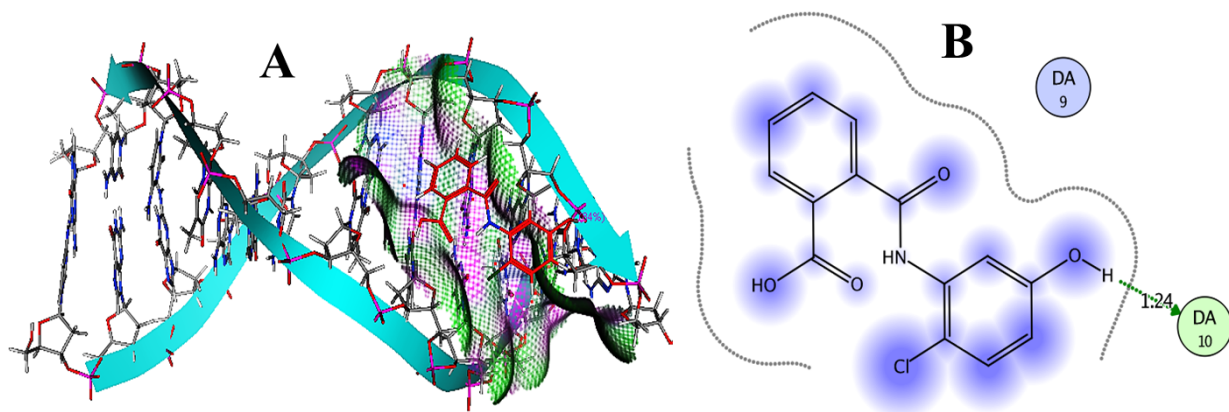

Fig. S4. (A) Docked pose and (B) Lig plot of CBA

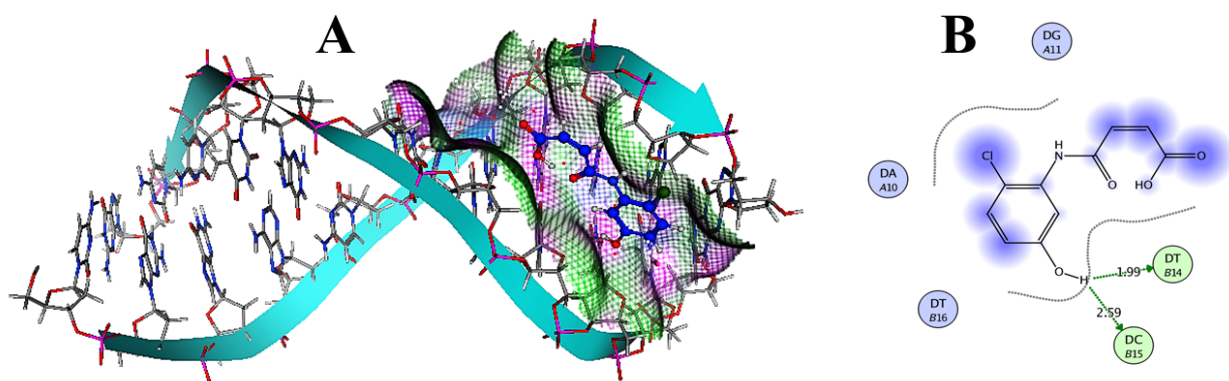

Fig. S5. (A) Docked pose and (B) Lig plot of OBEA
